# Supplementary material for: Reconfigurable carrier type and photodetection of MoTe2 of various thicknesses by deep ultraviolet light illumination
Source: Royal Society of Chemistry journal article supplement (doi:10.1039/d1na00881a), 2022-01-01
Supplement: d1na00881a1.pdf [file d1na00881a1.pdf]

## Supporting Information

# Reconfigurable carrier type and photodetection of MoTe<sub>2</sub> of various thickness by deep ultraviolet light illumination

Byung Min Ko<sup>1#</sup>, Muhammad Farooq Khan<sup>2#</sup>, Ghulam Dastgeer<sup>1</sup>, Gyu Nam Han<sup>1</sup>,  
Muhammad Asghar Khan<sup>1</sup> and Jonghwa Eom<sup>1\*</sup>

<sup>1</sup>Department of Physics & Astronomy and Graphene Research Institute, Sejong University,  
Seoul 05006, Korea

<sup>2</sup>Department of Electrical Engineering, Sejong University, Seoul 05006, Korea

#These authors contributed equally to this work

\*Corresponding author: eom@sejong.ac.kr

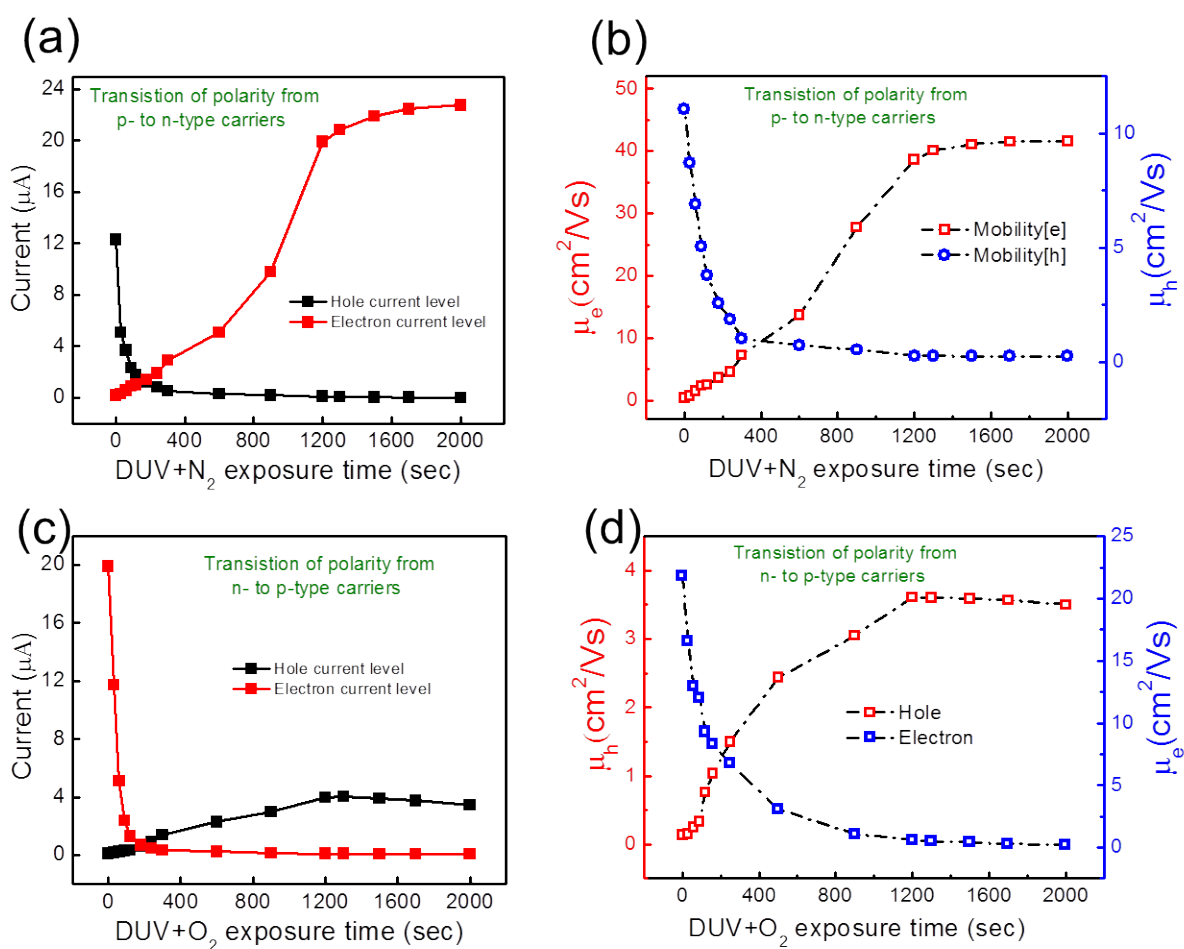

**Figure S1.** (a) Electron and hole current values at  $V_g = 60$  V with different DUV+N<sub>2</sub> treatment times. (b) Electron and hole mobility at different DUV+N<sub>2</sub> treatment times. (c) Electron and hole current values at  $V_g = 60$  V with different DUV+O<sub>2</sub> treatment times. (d) Electron and hole mobility at different DUV+O<sub>2</sub> treatment times.

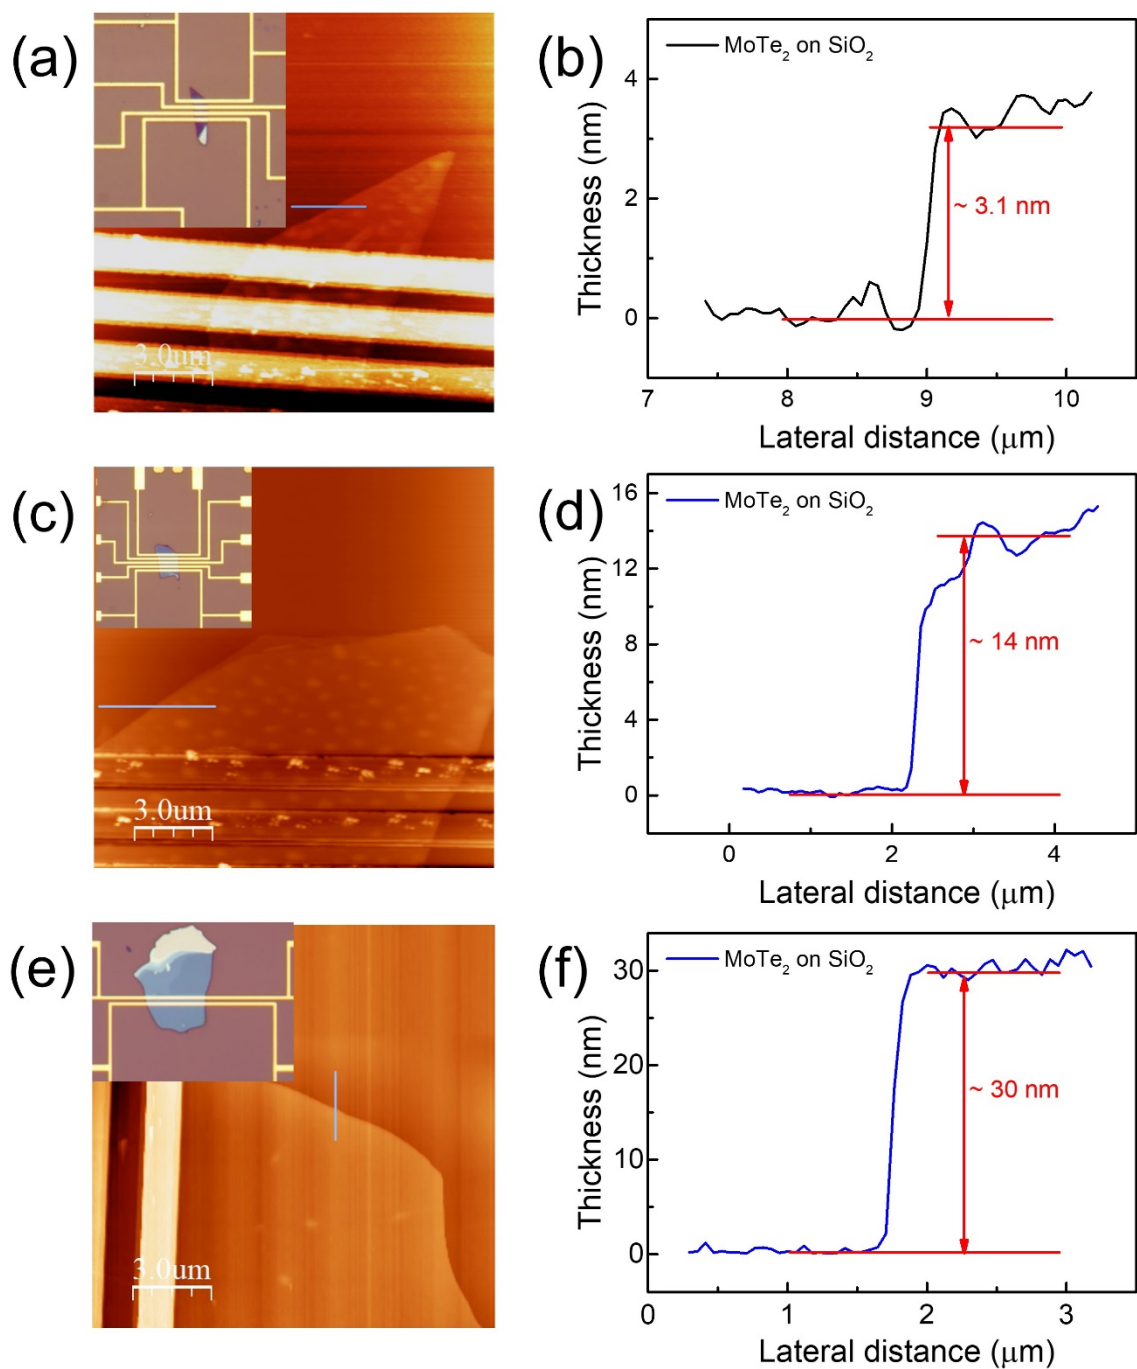

**Figure S2.** The AFM images and thickness profiles of different MoTe<sub>2</sub> flakes **(a)** AFM image of 3.1-nm-thick flake. **(b)** Height profile of 3.1 nm. **(c)** AFM image of 14-nm-thick flake. **(d)** Height profile of 14 nm. **(e)** AFM image of 30-nm-thick flake. **(f)** Height profile of 30 nm.

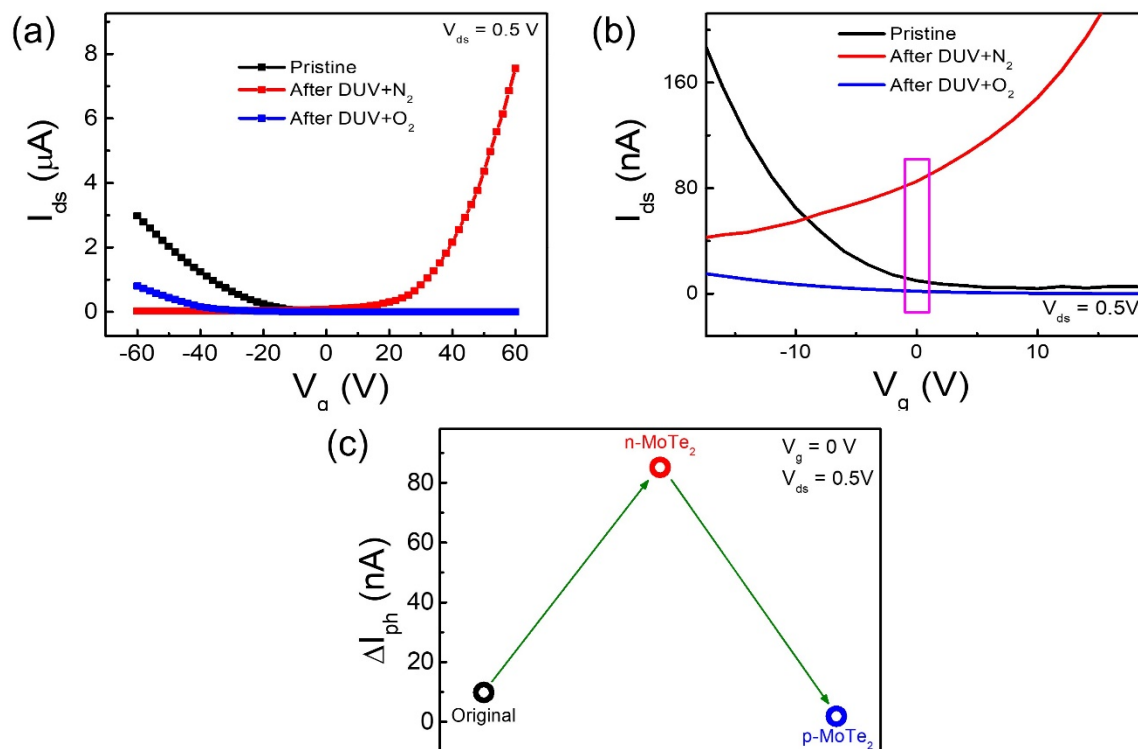

**Figure S3.** (a) Transfer curves of another pristine p-MoTe<sub>2</sub>, n-MoTe<sub>2</sub> after DUV+N<sub>2</sub> treatment and p-MoTe<sub>2</sub> after DUV+O<sub>2</sub> treatment. (b) Zoom-in view to see the current value at  $V_g = 0\text{ V}$ . (c) photocurrent generation of pristine p-MoTe<sub>2</sub>, n-MoTe<sub>2</sub> after DUV+N<sub>2</sub> treatment and p-MoTe<sub>2</sub> after DUV+O<sub>2</sub> treatment.
